# Supplementary material for: Structural basis for PPARγ transactivation by endocrine-disrupting organotin compounds
Source: PubMed Central journal article supplement (PMC4330522; doi:10.1038/srep08520), 2015-02-17
Supplement: srep08520-s1.pdf [file srep08520-s1.pdf]

## Supplemental Information

### Structural basis for PPAR $\gamma$ transactivation by endocrine disrupting organotin compounds

Shusaku Harada<sup>1</sup>, Youhei Hiromori<sup>2,3</sup>, Shota Nakamura<sup>4</sup>, Kazuki Kawahara<sup>1</sup>, Shunsuke Fukakusa<sup>1</sup>, Takahiro Maruno<sup>5</sup>, Masanori Noda<sup>5</sup>, Susumu Uchiyama<sup>5</sup>, Kiichi Fukui<sup>5</sup>, Jun-ichi Nishikawa<sup>6</sup>, Hisamitsu Nagase<sup>2</sup>, Yuji Kobayashi<sup>5</sup>, Takuya Yoshida<sup>1\*</sup>, Tadayasu Ohkubo<sup>1</sup>, Tsuyoshi Nakanishi<sup>2\*</sup>

<sup>1</sup>Graduate School of Pharmaceutical Sciences, Osaka University, 1-6 Yamadaoka, Suita, Osaka 565-0871, Japan. <sup>2</sup>Laboratory of Hygienic Chemistry and Molecular Toxicology, Gifu Pharmaceutical University, 1-25-4 Daigaku-nishi, Gifu, Gifu, 501-1196, Japan. <sup>3</sup>Department of Pharmacy, College of Pharmacy, Kinjo Gakuin University, 2-1723 Omori, Moriyamaku, Nagoya, Aichi, 463-8521, Japan. <sup>4</sup>Research Institute for Microbial Diseases, Osaka University, Suita, Osaka 565-0871, Japan. <sup>5</sup>Department of Biotechnology, Graduate School of Engineering, Osaka University, 2-1 Yamadaoka, Suita, Osaka 565-0871, Japan. <sup>6</sup>Laboratory of Health Sciences, School of Pharmacy and Pharmaceutical Sciences, Mukogawa Women's University, 11-68 Kyuban-cho, Koshien, Nishinomiya, Hyogo, 663-8179, Japan.

\* Correspondence and requests for materials should be addressed to T.N. (nakanishi@gifu-pu.ac.jp) or T.Y. (yo@phs.osaka-u.ac.jp)

## Supporting Tables

Table S1 Data collection and structural refinement statistics

|                                    | PPAR $\gamma$ -LBD/TBT  | PPAR $\gamma$ -LBD/TPT  |
|------------------------------------|-------------------------|-------------------------|
| <b>Data Collection</b>             |                         |                         |
| Beamline                           | Photon factory BL-6A    | Photon factory BL-17A   |
| Wavelength (Å)                     | 1.0000                  | 0.9800                  |
| Space group                        | $P2_1$                  | $P2_1$                  |
| Cell dimensions                    |                         |                         |
| <i>a</i> , <i>b</i> , <i>c</i> (Å) | 56.34, 88.29, 57.51     | 56.52, 88.49, 57.94     |
| $\alpha$ , $\beta$ , $\gamma$ (°)  | 90.00, 90.68, 90.00     | 90.00, 91.01, 90.00     |
| Resolution range (Å)               | 50.00-1.95 (1.98-1.95)  | 50.00-1.89 (1.92-1.89)  |
| $R_{\text{merge}}^b$               | 0.066 (0.352)           | 0.064 (0.372)           |
| $\langle I/\sigma I \rangle$       | 43.25 (7.2)             | 44.12 (6.3)             |
| Completeness (%)                   | 100 (100)               | 99.8 (99.5)             |
| Redundancy                         | 7.6 (7.5)               | 7.6 (7.3)               |
| <b>Refinement</b>                  |                         |                         |
| Resolution (Å)                     | 36.438-1.95 (2.00–1.95) | 36.515-1.89 (1.94–1.89) |
| No. reflections                    | 38942                   | 43047                   |
| $R_{\text{work}}$ (%)              | 0.194 (0.218)           | 0.203 (0.233)           |
| $R_{\text{free}}$ (%)              | 0.241 (0.270)           | 0.247 (0.247)           |
| No. of non-H atoms                 |                         |                         |
| Protein                            | 4164                    | 4116                    |
| Ligand                             | 26                      | 38                      |
| Water                              | 224                     | 223                     |
| Average B-factors                  |                         |                         |
| Overall (Å <sup>2</sup> )          | 25.4                    | 24.0                    |
| Protein (Å <sup>2</sup> )          | 25.0                    | 23.7                    |
| Ligand (Å <sup>2</sup> )           | 33.2                    | 48.2                    |
| Water (Å <sup>2</sup> )            | 26.2                    | 26.2                    |
| R.M.S. deviations                  |                         |                         |
| Bond length (Å)                    | 0.017                   | 0.017                   |
| Bond angles (°)                    | 1.627                   | 1.516                   |
| Ramachandran plot statistics       |                         |                         |
| Most favored (%)                   | 98.62                   | 98.81                   |
| Additional allowed (%)             | 1.38                    | 0.99                    |
| Disallowed (%)                     | 0.00                    | 0.20                    |

<sup>a</sup>Values in parentheses are for the highest resolution shell.

<sup>b</sup> $R_{\text{merge}} = \sum |I_h - \langle I_h \rangle| / \sum I_h$ , where  $\langle I_h \rangle$  is the average intensity of reflection *h* and symmetry-related reflections.

Table S2. Oligonucleotide primer sequences for site-directed mutagenesis

| Mutations | Primer sequences    |                                                |
|-----------|---------------------|------------------------------------------------|
|           | Sequence (5' to 3') |                                                |
| C285A     | Forward             | CAG GGC <b>GCA</b> CAG TTT CGC TCC GTG GAG     |
|           | Reverse             | GAA ACT <b>GTG</b> CGC CCT GAA AGA TGC GGA TGG |
| F363A     | Forward             | CTT TTG GTG <b>ACG</b> CAA TGG AGC CCA AGT TTG |
|           | Reverse             | CAT <b>TGC</b> GTC ACC AAA AGG CTT TCG CAG G   |

\* Mutated nucleotide positions are shown in boldface type.

## Supporting Figures

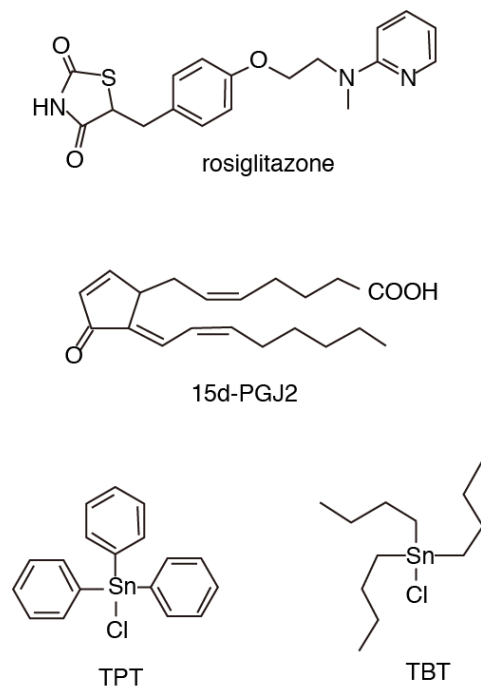

Fig. S1. Chemical structures of the ligands used in this study. Rosiglitazone is a representative of synthetic PPAR $\gamma$  full agonists. 15d-PGJ2 is an endogenous covalently-bound ligand of PPAR $\gamma$ . TPT (triphenyltin) and tributyltin (TBT) are organotin compounds.

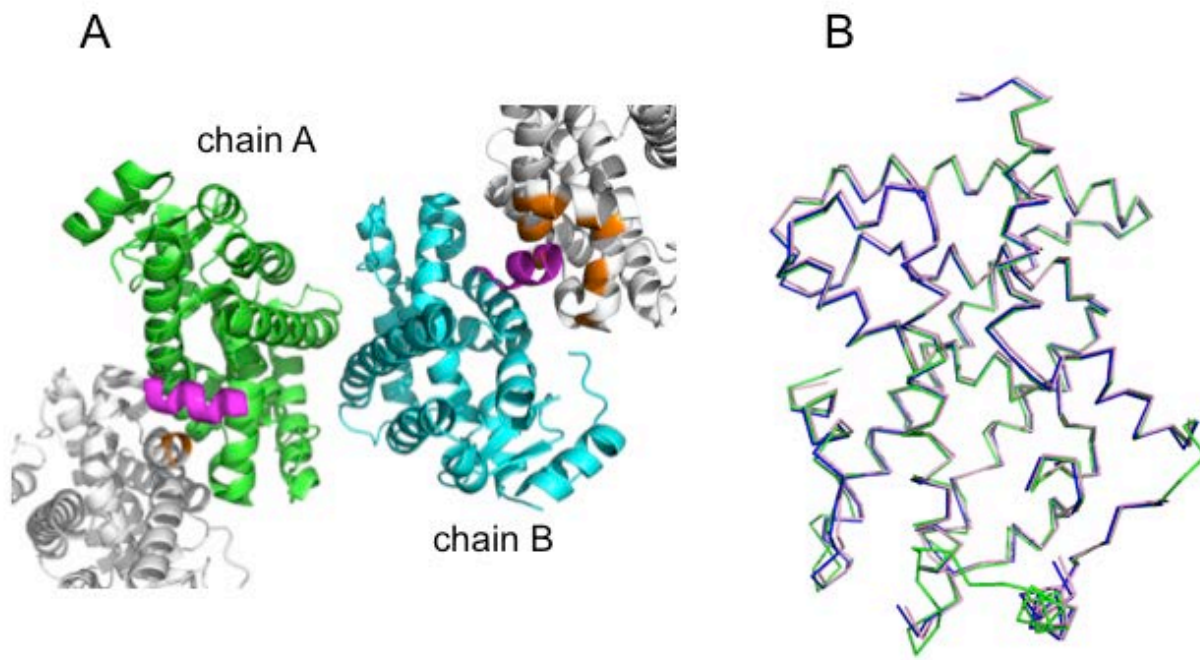

Fig. S2. (A) Crystal structure of PPAR $\gamma$ -LBD. The asymmetric unit contains two molecules of PPAR $\gamma$ -LBD, named chain A (green) and B (cyan). The residues of the neighboring symmetry mates (gray) that interact with helix12 (magenta in both chains), are shown in orange. (B) Superposition of C $\alpha$  traces of PPAR $\gamma$ -LBD. The structure of chain A obtained in this study (blue, PPAR $\gamma$ -LBD-TBT; pink, PPAR $\gamma$ -LBD-TPT) closely resembles that of the PPAR $\gamma$ -LBD-agonist-co-activator peptide complex (green; PDB No. 2PRG, Nolte et al. 1998).

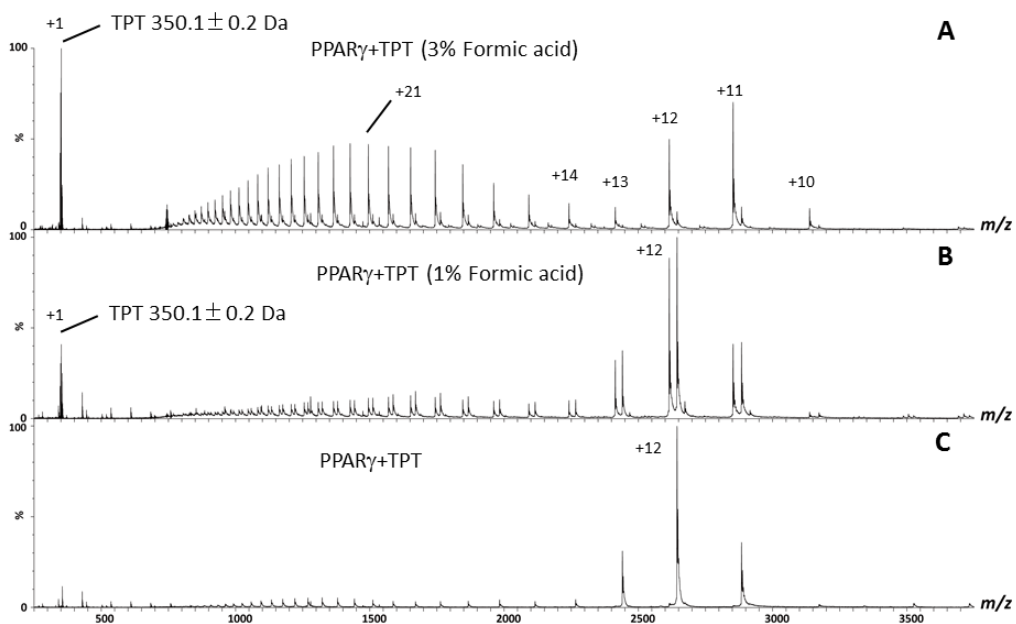

Fig. S3. Non-denaturing ESI-MS of TPT bound to PPAR $\gamma$ -LBD. The addition of aliquots of formic acid (A = 3%, B = 1%, C = 0%) to the PPAR $\gamma$ -LBD-TPT complex resulted in different MS patterns even under the same MS conditions. The results show that the gradual addition of formic acid to the PPAR $\gamma$ -TPT complex causes the dissociation of TPT, which is observed as a singly charged species with a molecular mass of 350.1 Da.

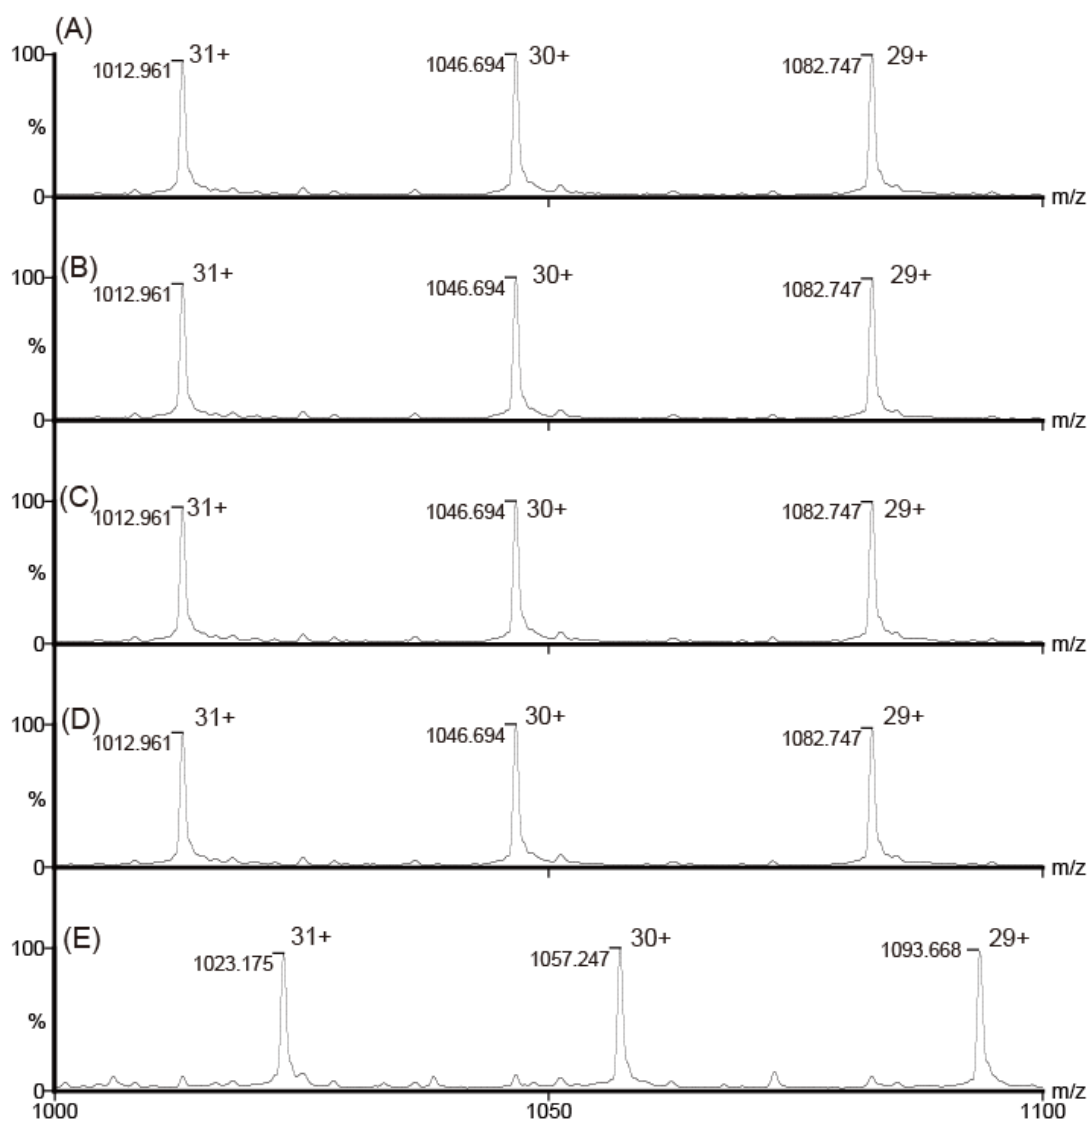

Fig. S4. Denaturing LC-ESI-MS spectra of PPAR $\gamma$ -LBD (A) and its complexes with TBT (B), TPT (C), rosiglitazone (D), and 15d-PGJ2 (E). Observed average mass values are 31370.4 Da (A-D) and 31687.0 Da (E). The increase in mass of PPAR $\gamma$ -LBD/15d-PGJ2 (+316.6 Da) indicates that covalent-bound 15d-PGJ2 (Calc: 316.4 Da) was not dissociated in the denaturing conditions.

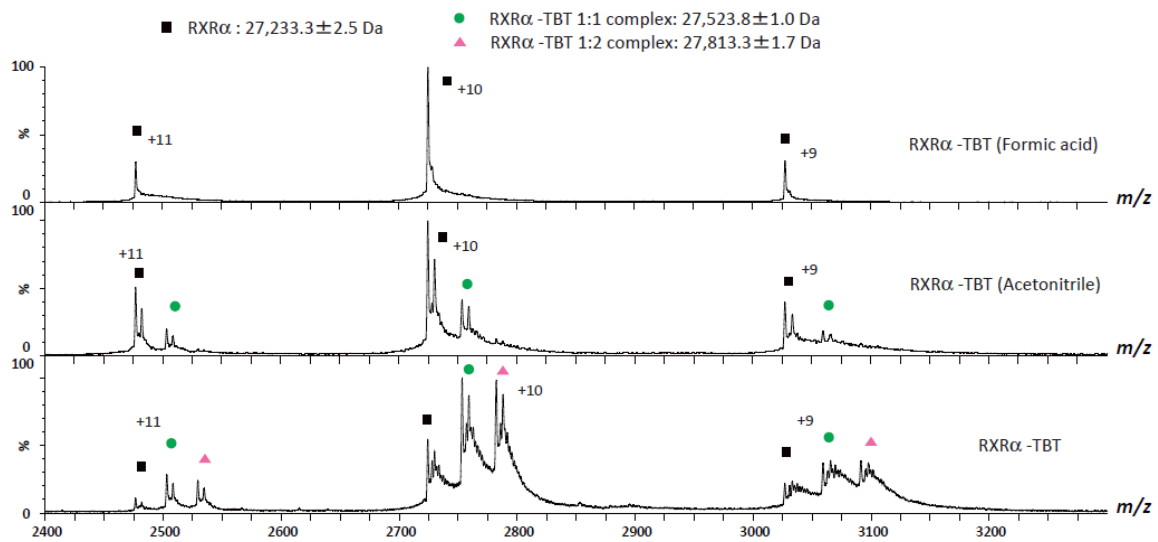

Fig. S5. Non-denaturing ESI-MS of TBT bound to RXR $\alpha$ -LBD. The addition of aliquots of 3% formic acid or acetonitrile to RXR $\alpha$ -LBD-TBT. TBT dissociates from RXR $\alpha$  under these conditions.



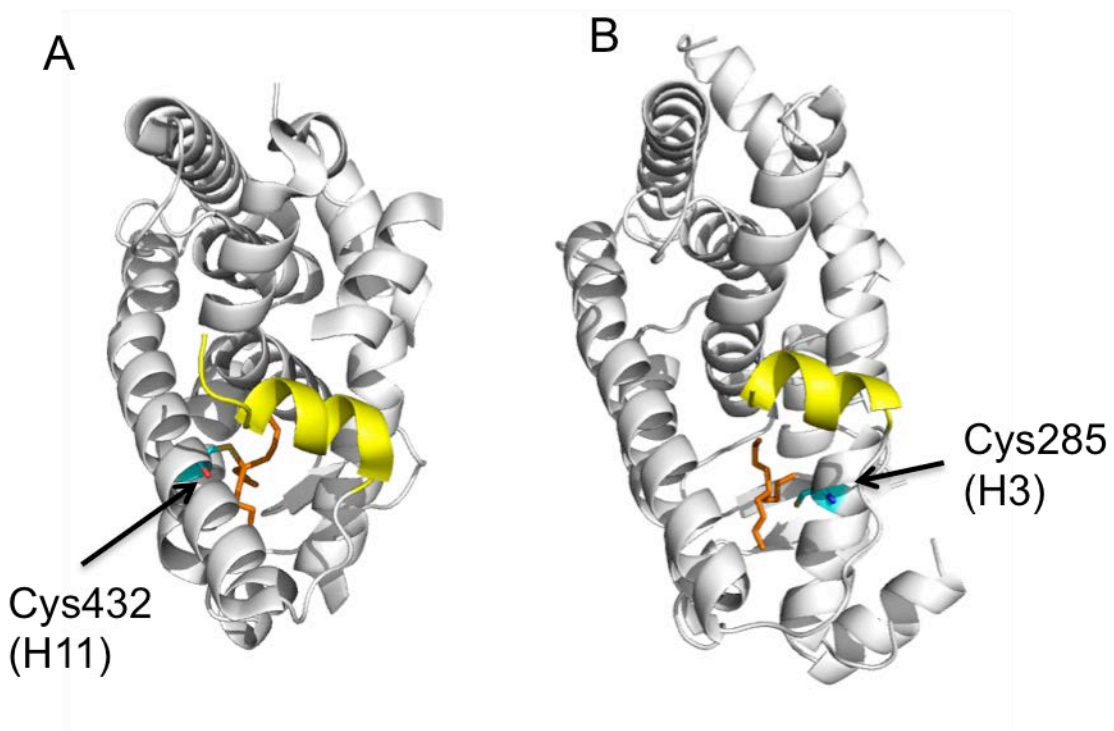

Fig S6. TBT-bound structure of the ligand-binding domain of RXR $\alpha$  (A) and PPAR $\gamma$  (B). Helix 12 is shown in yellow. The anchoring cysteine for TBT is colored in cyan. The TBT molecule is depicted as orange sticks.

## Supporting Methods

### *Expression and purification of RXR $\alpha$ -LBD.*

Human RXR $\alpha$ -LBD (residues 223–462) was cloned into vector pET-15b, which was used to transform *E. coli* BL21(DE3) cells. Transformants were grown at 37 °C in LB medium containing 50  $\mu$ g/ml ampicillin to  $A_{600} = 0.6$ , and then induced by the addition of IPTG at a final concentration of 1 mM. The cells were then grown for an additional 4 h. Harvested cells were lysed by sonication. The supernatant was applied to a HisTrap HP column (GE Healthcare) equilibrated with buffer (50 mM Tris-HCl [pH 8.0], 500 mM NaCl). RXR $\alpha$ -LBD was eluted with the same buffer containing 125 mM imidazole and dialyzed against 20 mM Tris-HCl (pH 8.0). The His-tag was removed by proteolysis with thrombin. Finally, RXR $\alpha$ -LBD was purified by gel filtration on Superdex S200 and concentrated by using an Amicon Ultra 15 concentrator (Millipore).

### *Mass spectroscopy in denaturing condition.*

LC-ESI-MS analyses were performed on an ACQUITY UPLC system (Waters, MA, USA) coupled to a SYNAPT G2 mass spectrometer (Waters, MA, USA). Prior to LC-ESI-MS analysis, PPAR $\gamma$  (50  $\mu$ M) were incubated with TPT-Cl, TBT-Cl, rosiglitazone, and 15d-PGJ2 (500  $\mu$ M each) for 3 hours. All samples (1  $\mu$ g each) were injected onto a Waters MassPREP Micro Desalting column (60°C column temperature). Samples were eluted from the column with a 10 min gradient (5–90% B, 0.200 mL/min flow rate). Mobile phase A was 0.1% FA in H<sub>2</sub>O. Mobile phase B was 0.1% FA in acetonitrile. The SYNAPT G2 mass spectrometer was run in positive ion, sensitivity mode with detection in the range of 100–5000 m/z. Source parameters were as follows: capillary voltage, 3.00 kV; sampling cone voltage, 40.0 V; source temperature, 150°C; desolvation temperature, 350°C; cone gas flow: 100 L/hr; desolvation gas flow, 800 L/hr. The mass spectrometry was calibrated with cesium iodide (Sigma-Aldrich Co. MO, USA), and lock mass were performed with [Glu1]-Fibrinopeptide B (Sigma-Aldrich Co. MO, USA). Molecular

mass was calculated by MassLynx software (version 4.1, Waters, MA, USA).
